# Supplementary material
Source: Royal Society of Chemistry journal article supplement (doi:10.1039/d6gc02097f)
Supplement: d6gc02097f1.pdf [file d6gc02097f1.pdf]

1  
2  
3  
4  
5  
6  
7  
8  
9  
10  
11  
12  
13  
14  
15  
16  
17  
18  
19  
20  
21  
22  
23  
24

## Supplementary Information

### **Naphthols improve lignin separation and induce photoluminescent structural changes during glycolic acid/pentanol biphasic pretreatment of poplar**

Hong Liao<sup>a,b</sup>, Wenjun Ying<sup>a,b,c,d</sup>, Junjun Zhu<sup>a,b,c,d</sup>, Huayou Chen<sup>e</sup>, Junhua Zhang<sup>a,b,c,d\*</sup>

<sup>a</sup> State Key Laboratory for Development and Utilization of Forest Food Resources, Nanjing Forestry University, Nanjing 210037, China

<sup>b</sup> Jiangsu Co-Innovation Center of Efficient Processing and Utilization of Forest Resources, College of Chemical Engineering, Nanjing Forestry University, Nanjing 210037, China

<sup>c</sup> Key Laboratory of Forestry Genetics & Biotechnology (Nanjing Forestry University), Ministry of Education, Nanjing 210037, China

<sup>d</sup> Jiangsu Province Key Laboratory of Green Biomass-based Fuels and Chemicals, Nanjing 210037, China

<sup>e</sup> School of Life Sciences, Jiangsu University, Zhenjiang, 212013, China

\*Corresponding author

Tel.: +86-13770609339

E-mail address: junhuazhang@njfu.edu.cn (J. Zhang)

## 25 **1. Methods description**

### 26 **1.1 Cellulase hydrolysis of poplar solid residue**

27 Enzymatic hydrolysis of poplar solid residue was performed in 50 mM sodium  
28 citrate buffer (pH 4.8) at 50 °C with continuous shaking at 150 rpm. The substrate  
29 loading was set at 5% (w/w) solids in a total working volume of 20 mL. Commercial  
30 cellulase was added at dosages of 5-20 FPU g<sup>-1</sup> dry solid. The hydrolysis reaction was  
31 conducted for up to 72 h. Following the reaction, the mixture was heat-inactivated and  
32 then centrifuged to collect the supernatant containing the released sugars.

### 33 **1.2 Monosaccharides and by-products analysis**

34 Aqueous samples were centrifuged at 8,000 ×g for 10 min and subsequently  
35 filtered through 0.22 µm syringe filters prior to analysis. Monosaccharides (xylose,  
36 glucose, arabinose) and by-products (formic acid, acetic acid, 5-  
37 hydroxymethylfurfural, furfural) were quantified by high-performance liquid  
38 chromatography (Agilent 1200) equipped with a refractive index detector and an  
39 Aminex HPX-87H column (300 × 7.8 mm, Bio-Rad). The column was maintained at  
40 45 °C with 5 mM H<sub>2</sub>SO<sub>4</sub> as the mobile phase at a flow rate of 0.6 mL min<sup>-1</sup> <sup>21</sup>.  
41 Quantification was performed using external calibration curves established with  
42 authentic standards.

### 43 **1.3 Lignin isolation and pentanol recovery**

44 Lignin was recovered from the organic phase following biphasic pretreatment.  
45 The pentanol-rich phase was evaporated under reduced pressure at 50–55 °C using a  
46 rotary evaporator, with the evaporated pentanol being condensed and collected for  
47 recycling. The resulting precipitate was washed repeatedly with deionized water until  
48 neutral pH was achieved, followed by freeze-drying to obtain the isolated lignin. The  
49 recovered lignin samples were subsequently subjected to chemical composition

50 analysis to assess their purity.

#### 51 **1.4 FTIR analysis and semi-quantitative index calculation**

52 Fourier-transform infrared (FTIR) spectra of lignin samples were recorded on a  
53 FTIR spectrometer equipped with an attenuated total reflectance (ATR) accessory.  
54 Dried lignin powders were gently ground and pressed onto the ATR crystal, and  
55 spectra were collected in the range of 4000–600  $\text{cm}^{-1}$  with a spectral resolution of 4  
56  $\text{cm}^{-1}$  by co-adding 32 scans. Background spectra of the clean crystal were recorded  
57 before each measurement and automatically subtracted. All samples were equilibrated  
58 at room temperature and measured under identical instrumental settings to enable  
59 semi-quantitative comparison.

60 The aromaticity index was defined as the integrated absorbance of the aromatic  
61 skeletal region (1608–1425  $\text{cm}^{-1}$ ), normalized to the O–H stretching band (3600–  
62 3200  $\text{cm}^{-1}$ ). The hydrophobicity index was calculated as the integrated absorbance of  
63 the aliphatic C–H region (3000–2800  $\text{cm}^{-1}$ ), normalized to the O–H band. The  
64 carbonyl conjugation index was derived by deconvoluting the baseline-corrected  
65 carbonyl region (1800–1600  $\text{cm}^{-1}$ ) into two components: non-conjugated C=O groups  
66 centered at 1703  $\text{cm}^{-1}$  and conjugated/carboxylate C=O groups at 1662  $\text{cm}^{-1}$ . The  
67 conjugation index was expressed as the ratio of the integrated area of  
68 conjugated/carboxylate C=O to the total carbonyl absorbance. All spectra were  
69 baseline-corrected and area-normalized using OriginPro, and peak deconvolution was  
70 performed using Gaussian fitting.

#### 71 **1.5 Elemental analysis of lignin samples**

72 The contents of carbon (C), hydrogen (H), and nitrogen (N) in the lignin samples  
73 were determined using an elemental analyzer (e.g., Vario EL cube, Elementar,  
74 Germany) under a helium carrier gas flow. Approximately 2.0–3.0 mg of dried and

75 homogenized lignin powder was accurately weighed and combusted in an oxygen-rich  
76 environment at 1150–1200 °C. The resulting gases (CO<sub>2</sub>, H<sub>2</sub>O, N<sub>2</sub>) were separated and  
77 detected via thermal conductivity detector (TCD), and the respective percentages of C,  
78 H, and N were calculated. Oxygen content (O) was determined by difference.

79

80 **2. Figures and tables**

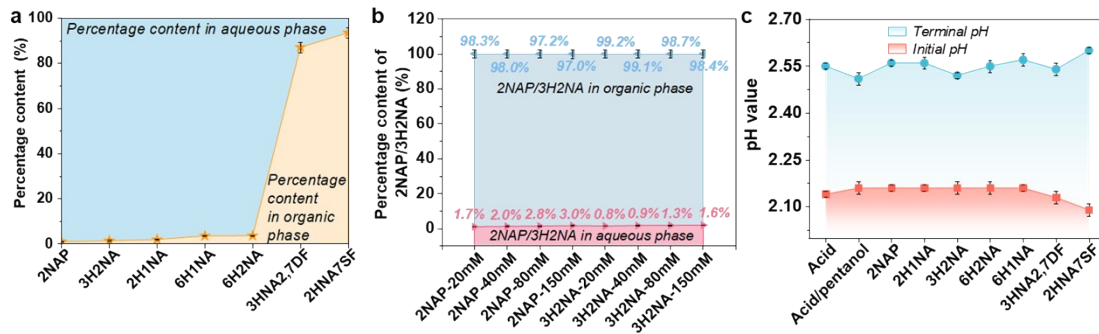

81

82 Fig. S1 (a) Distribution of naphthol derivatives between the aqueous and organic

83 phases. (b) Effect of concentration on the aqueous/organic distribution of 2NAP and

84 3H2NA. (c) pH of the aqueous phase before and after acid/pentanol pretreatment of

85 poplar with 20 mM naphthol derivatives at 180 °C for 30 min.

86

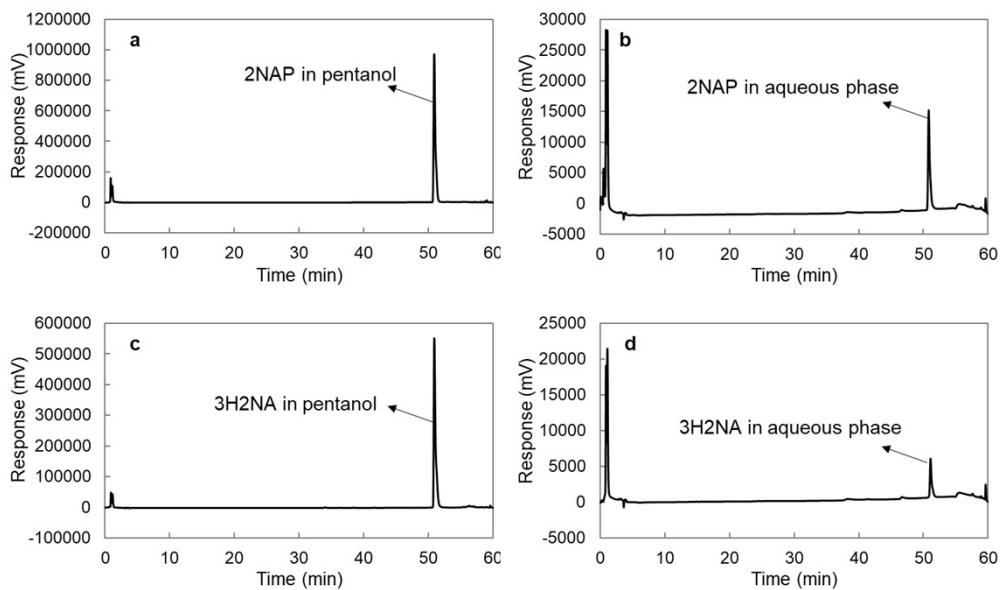

87

88 Fig. S2 Distribution of 20 mM 2NAP (a, b) and 3H2NA (c, d) in the organic (pentanol)

89 and aqueous phases.

90

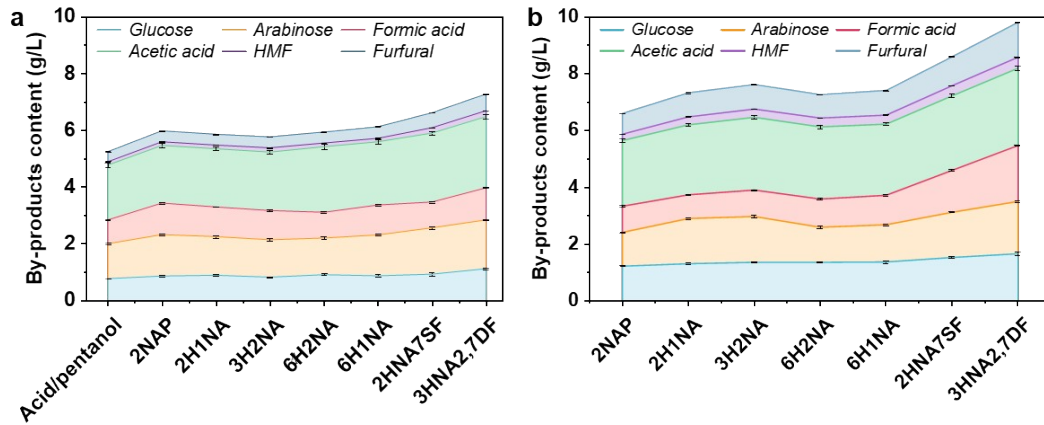

91

92 Fig. S3 Glycolic acid/pentanol pretreatment of poplar at 180 °C for 30 min with 20

93 mM naphthol derivatives. By-products content in aqueous phase at 20 mM (a) and 40

94 mM (b).

95

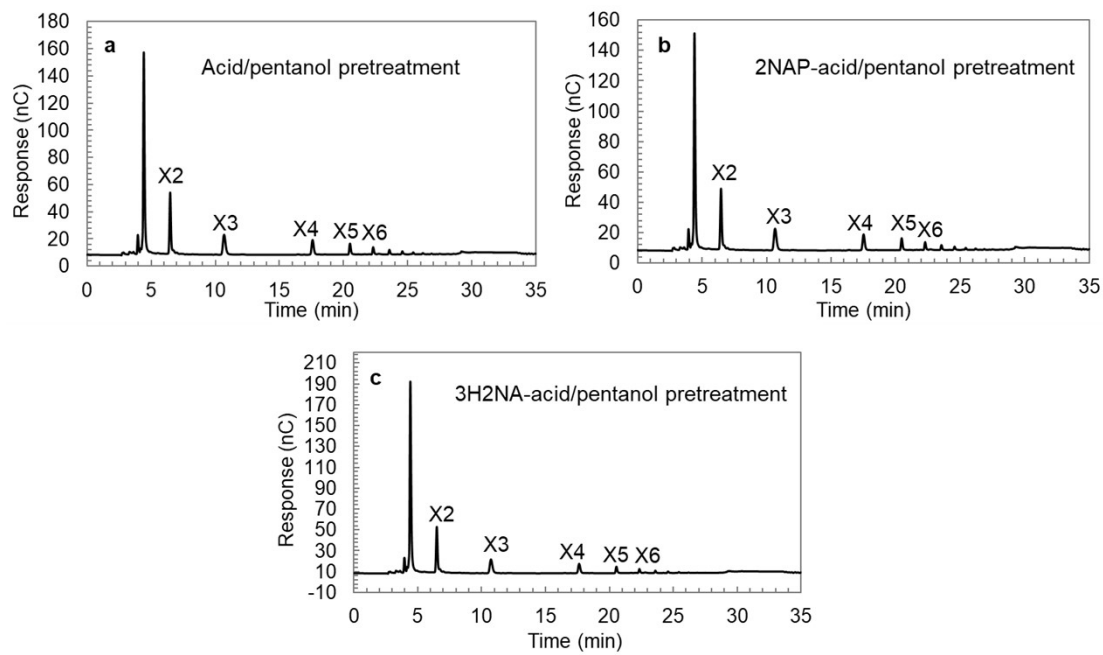

96

97 Fig. S4 HPAEC spectra of XOS obtained from poplar by acid/pentanol pretreatment

98 without (a) and with 20 mM 2NAP (b) /3H2NA (c) at 180 °C for 40 min.

99

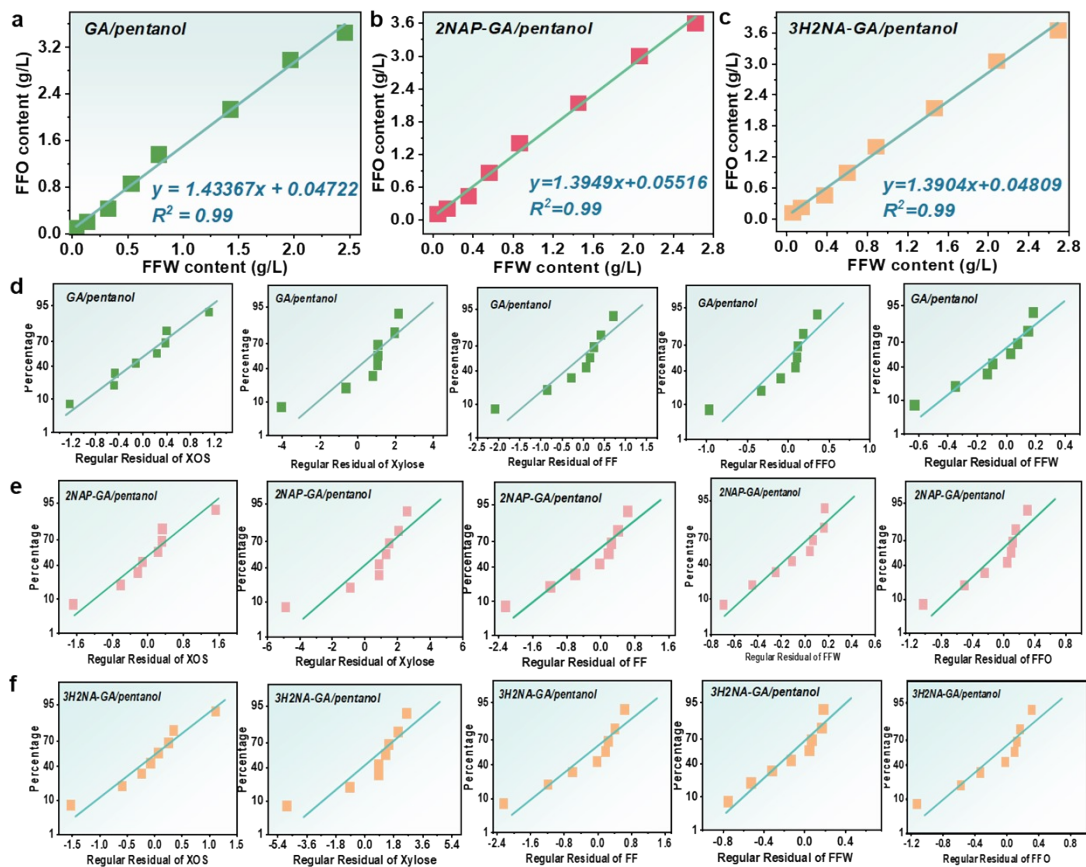

100  
 101 Fig. S5 Fitting of the phase partition coefficient for GA/pentanol (a), 2NAP-  
 102 GA/pentanol (b), 3H2NA-GA/pentanol (c) pretreatments. Normal probability plot of  
 103 residuals from the kinetic fitting of hemicellulose degradation for GA/pentanol (d),  
 104 2NAP-GA/pentanol (e), 3H2NA-GA/pentanol (f) pretreatments.

105

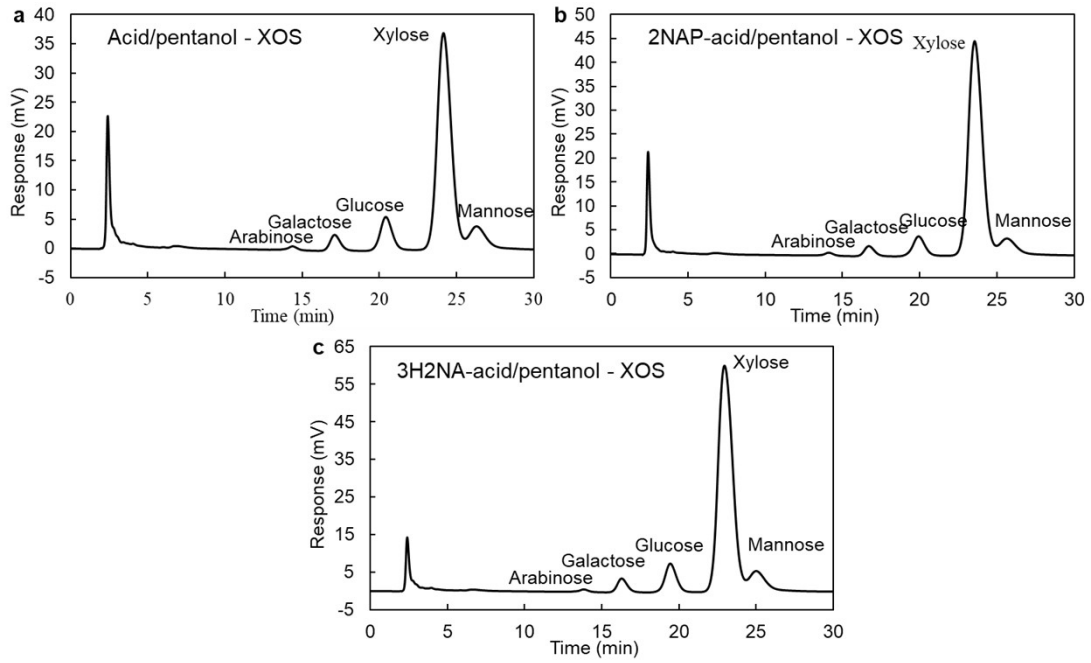

106

107 Fig. S6 HPAEC spectrum of monosaccharide composition in XOS obtained via  
 108 acid/pentanol pretreatment of poplar: untreated (a) and treated with 20 mM 2NAP  
 109 (b)/3H2NA (c) at 180 °C for 40 min.

110

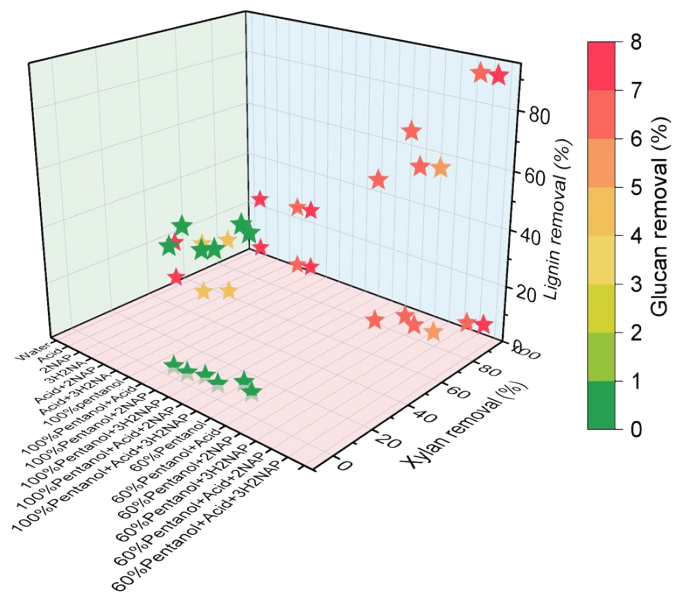

111 Fig. S7 Solvation effects in naphthol-assisted acid/pentanol biphasic pretreatment at  
 112 180 °C for 30 min.

113

114 Table S1 Semi-quantitative FTIR analysis of residual lignin from naphthol-assisted  
115 pretreatment of poplar: relative band intensities for the aromaticity, hydrophobicity,  
116 and conjugation indices.

|              | Aromaticity index | Hydrophobicity index | Conjugation index |
|--------------|-------------------|----------------------|-------------------|
| Poplar-MWL   | 0.48±0.02         | 0.47±0.03            | 0.24±0.01         |
| Pentanol-MWL | 0.52±0.05         | 0.35±0.02            | 0.30±0.02         |
| 2NAP-MWL     | 0.55±0.06         | 0.28±0.02            | 0.39±0.02         |
| 3H2NA-MWL    | 0.59±0.03         | 0.28±0.04            | 0.40±0.02         |

117

118

119 Table S2 Qualitative comparison of solvent polarity and viscosity.

| Solvent                   | Protic/aprotic | Polarity | Viscosity |
|---------------------------|----------------|----------|-----------|
| Dimethyl sulfoxide (DMSO) | Aprotic        | ★★★★     | ++        |
| Acetonitrile (ACN)        | Aprotic        | ★★★      | +         |
| Tetrahydrofuran (THF)     | Aprotic        | ★★       | +         |
| Toluene (PhMe)            | Aprotic        | ★        | +         |
| Methanol (MeOH)           | Protic         | ★★★      | +         |
| Ethylene glycol (EG)      | Protic         | ★★★      | ++++      |

Polarity: more ★ = higher polarity;  
Viscosity: more + = higher viscosity

120
